# Supplementary figures and images for: Uptake of Aβ by OATPs Might Be a New Pathophysiological Mechanism of Alzheimer Disease
Source: Research Square preprint supplement (doi:10.21203/rs.3.rs-125629/v1), 2020-12-29

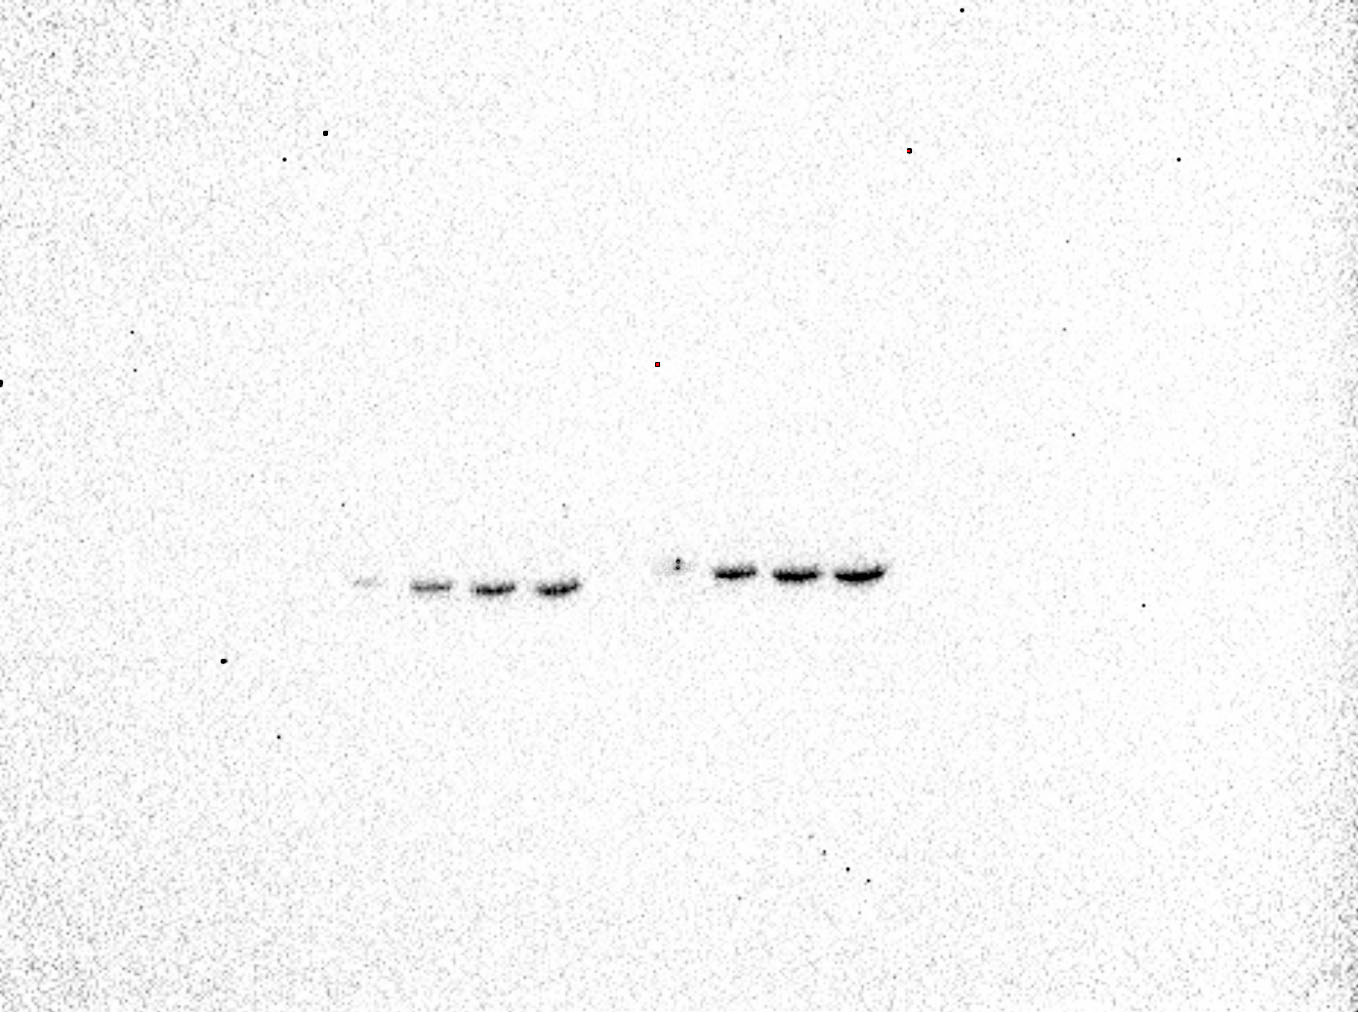


**Aβ1-42-24h-1**


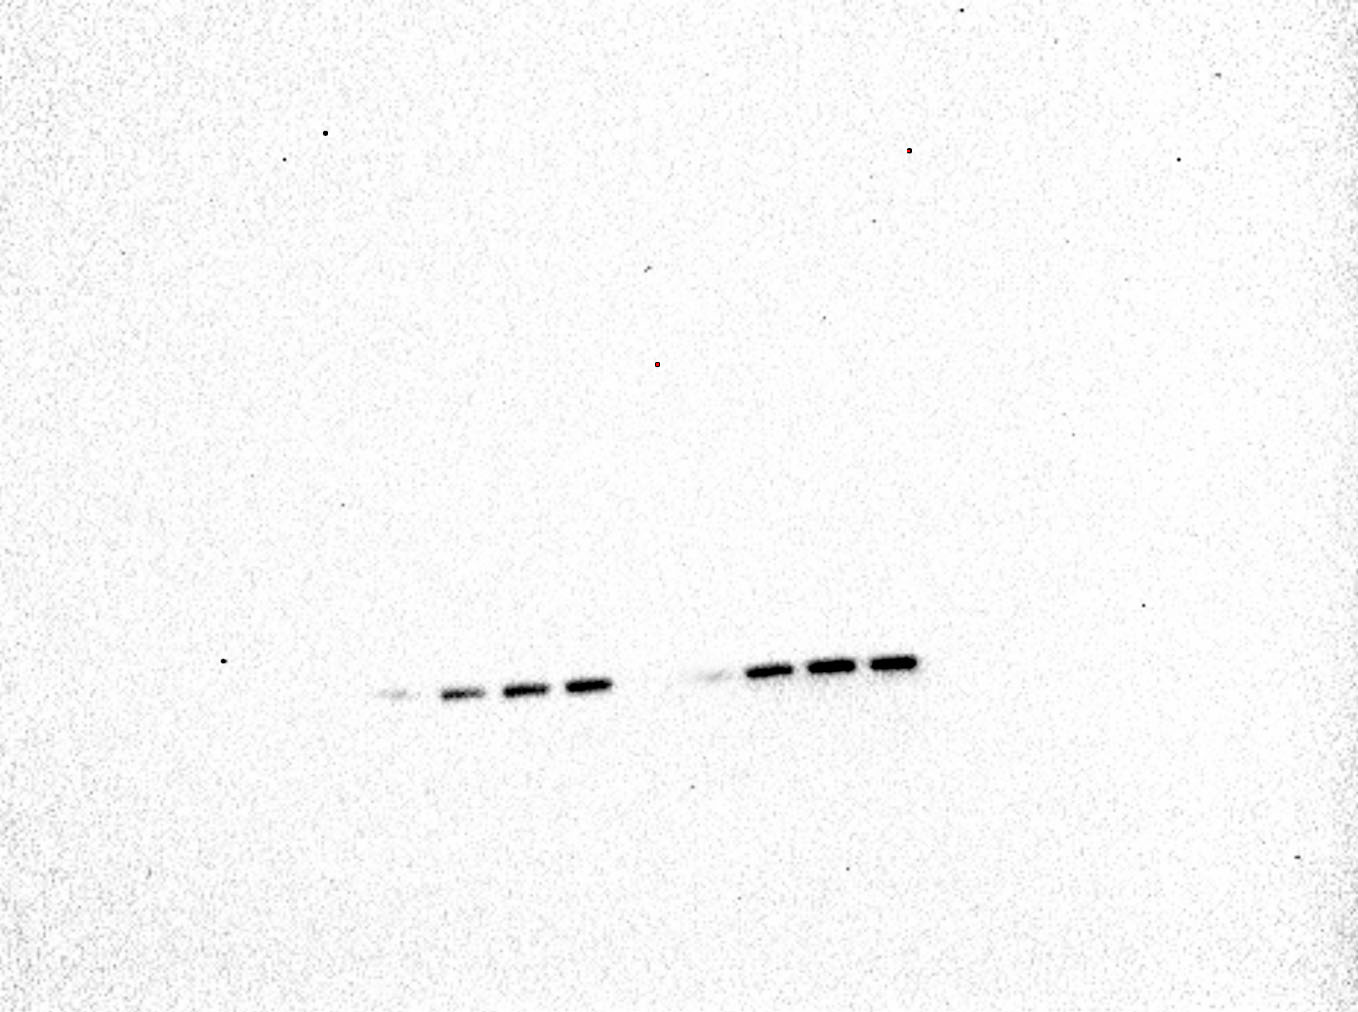


**Aβ1-42-48h-2**


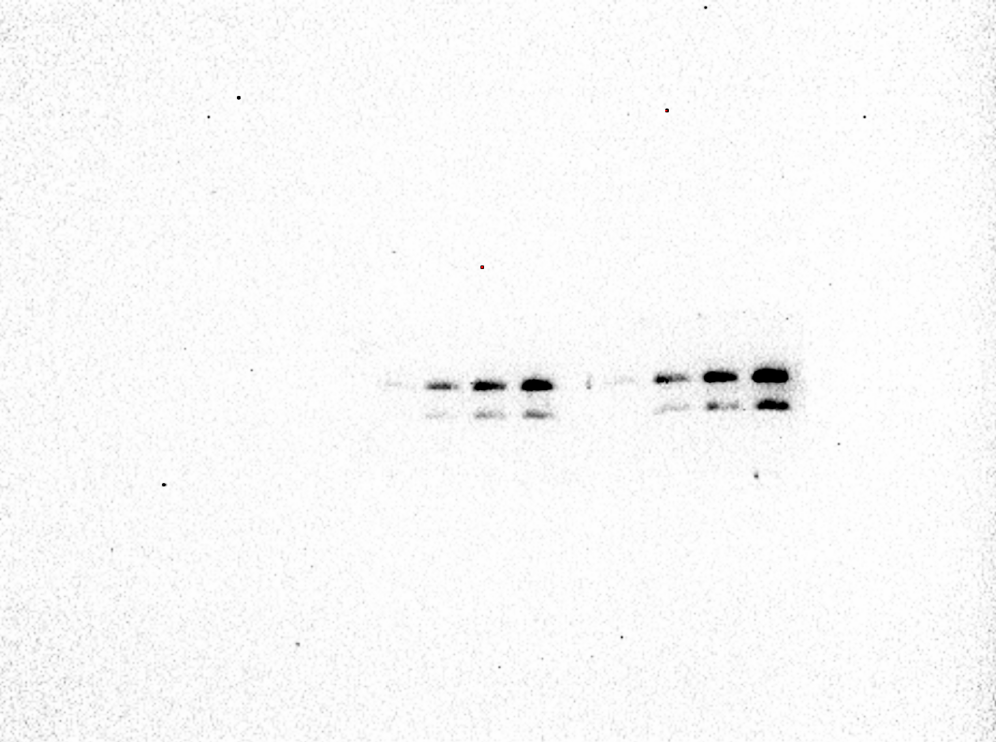


**Aβ1-42-72h**


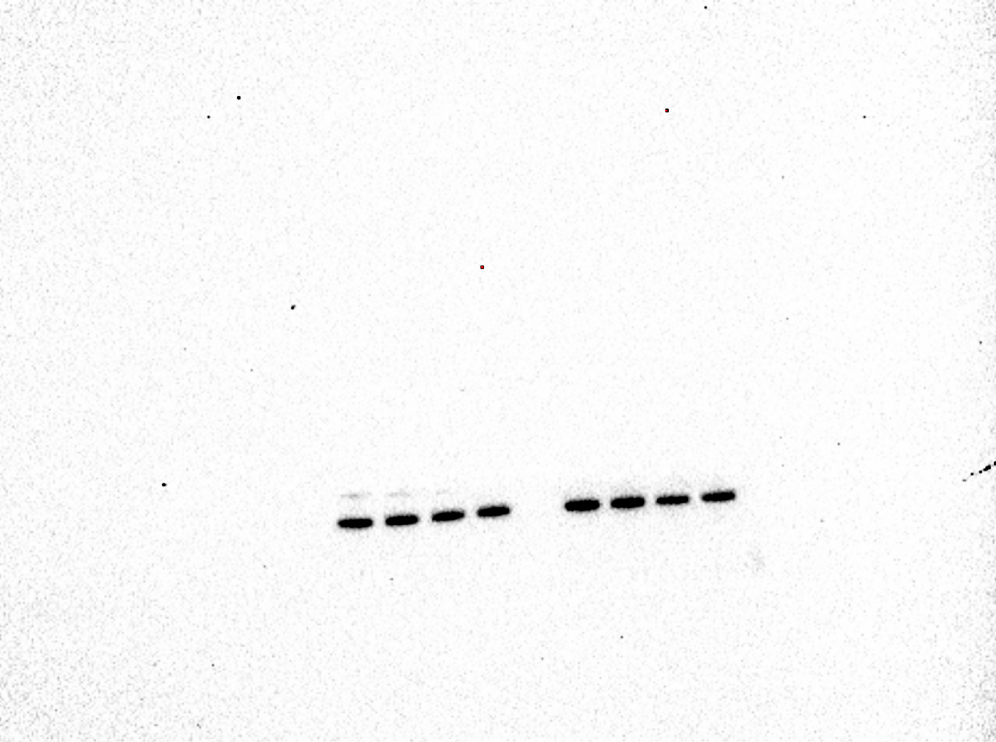


**βactin-24h**


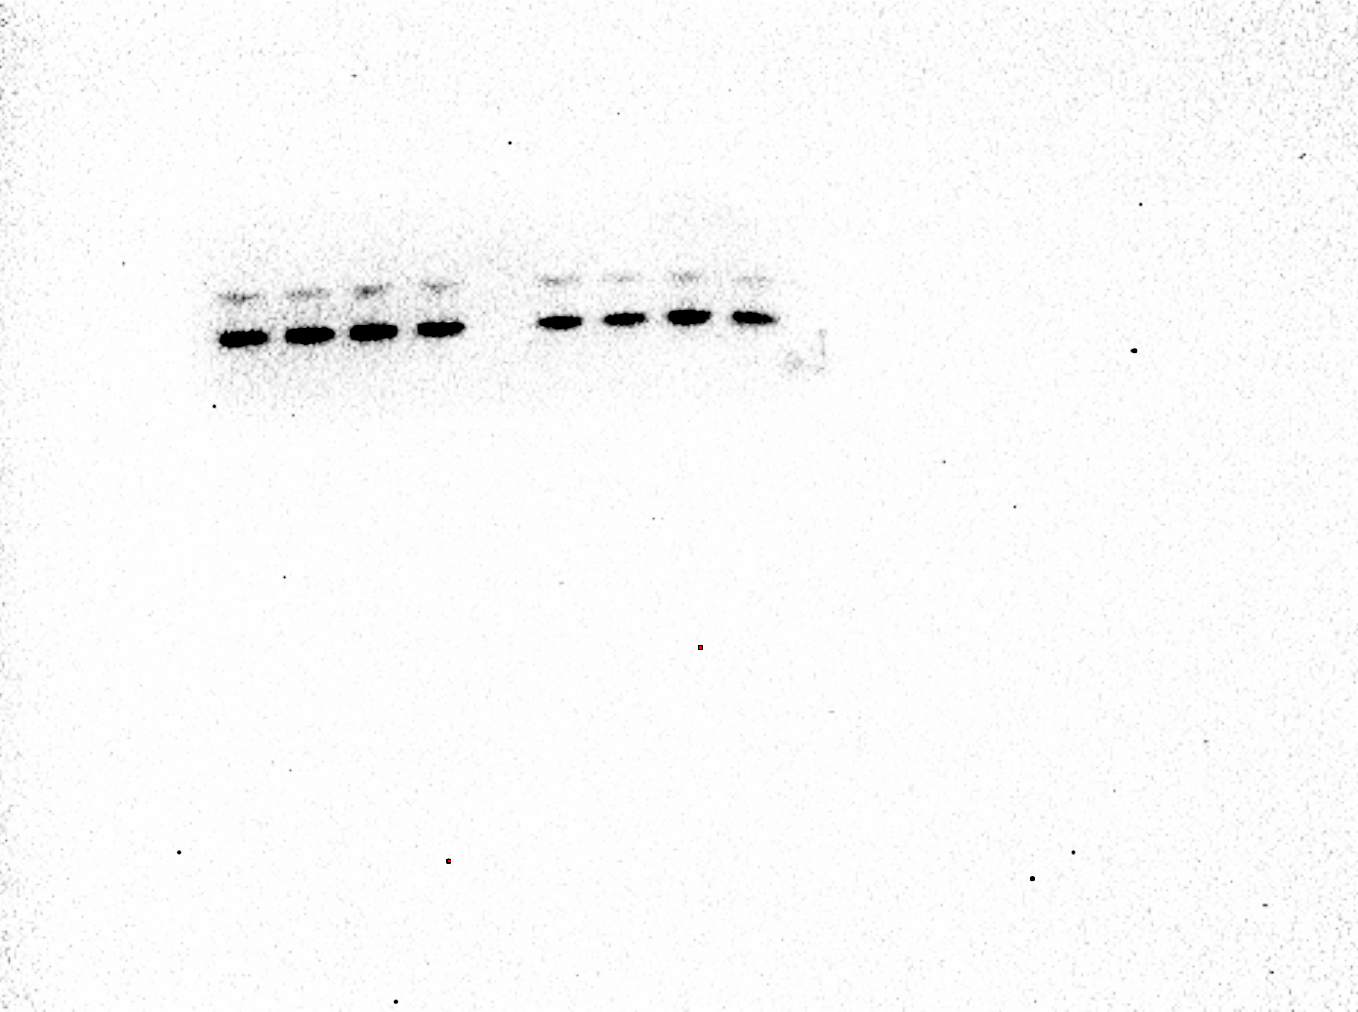


**βactin-48h**


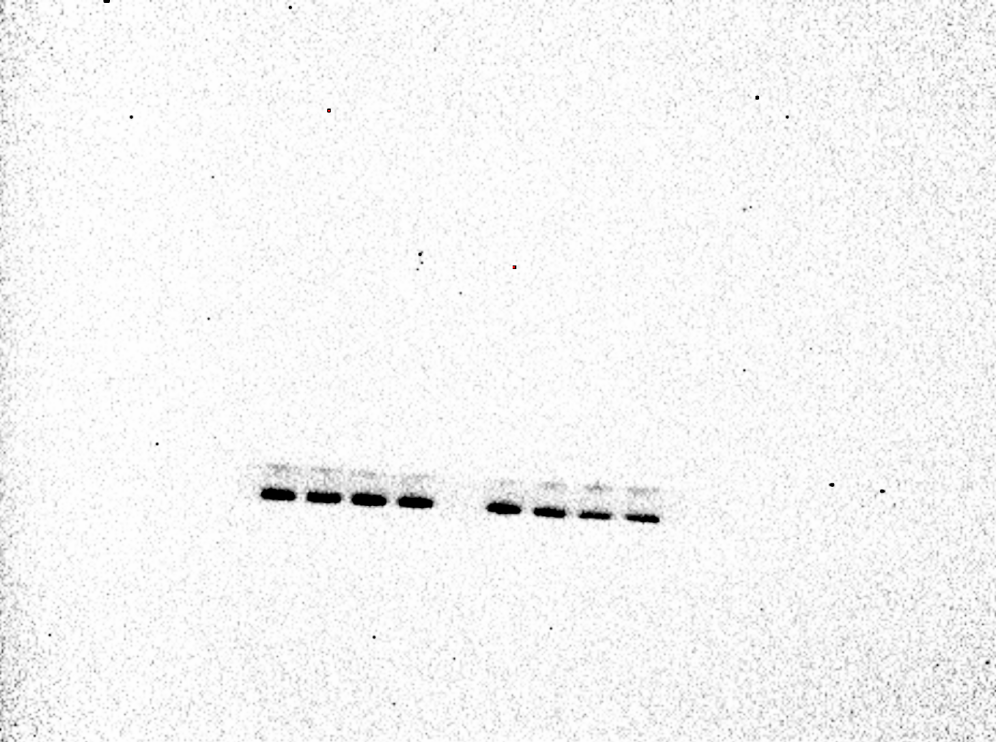


**βactin-72h**

Supplement: Supplementary file 1 [file 32718835d6be9d0f28370926.docx]
